# Supplementary material for: Salt Effect on the Cloud Point Phenomenon of Amphiphilic Drug-Hydroxypropylmethyl Cellulose System
Source: Hindawi journal article supplement (doi:10.1155/2014/293972), 2014-01-01
Supplement: f1 [file 293972.f1.pdf]

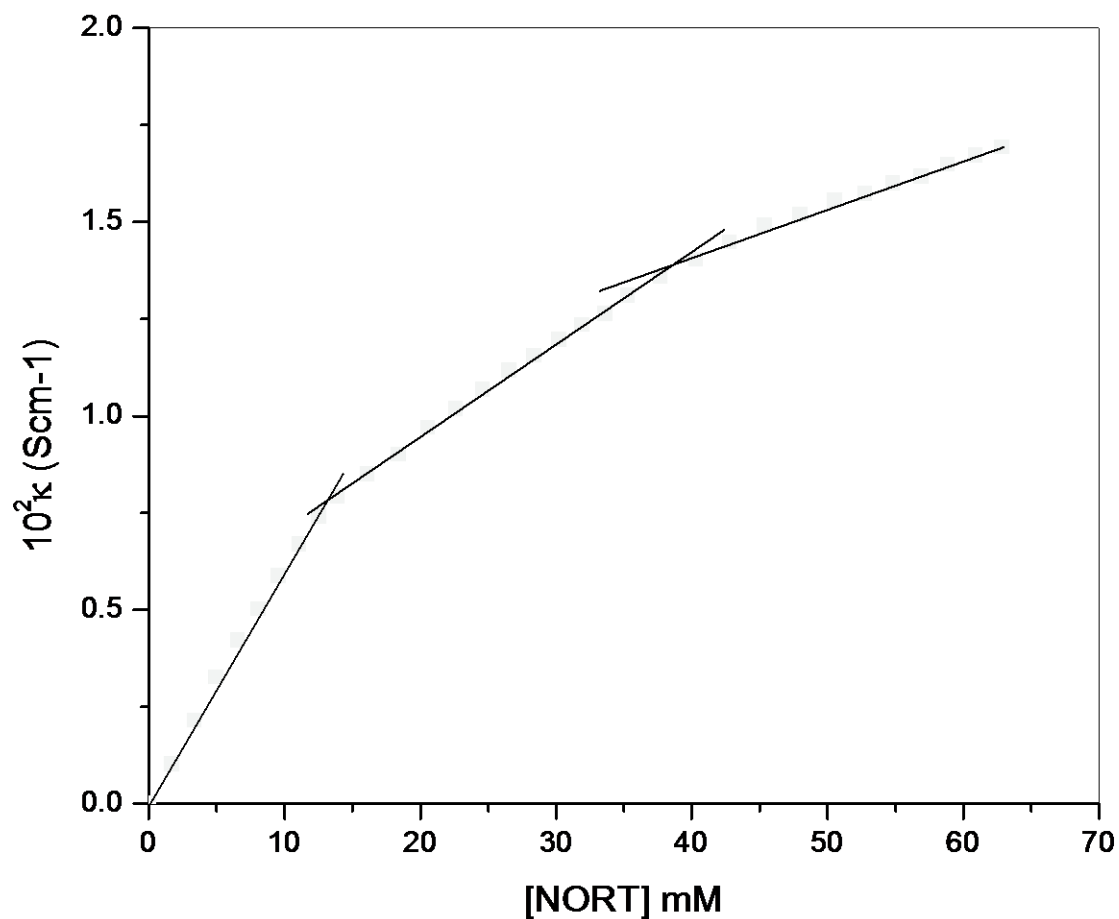

**Fig. S1.** Plot of specific conductivity ( $\kappa$ ) versus [NORT] at 25 °C.

The conductivity versus [NORT] profile in presence of polymer displays two break-points. First break-point is regarded as critical aggregation concentration while second one is regarded as critical micelle concentration.
